# Supplementary material for: Synthesis and properties of processible copolymer microparticles from chloroanilines and aniline
Source: Royal Society of Chemistry journal article supplement (doi:10.1039/b412587h), 2005-01-01
Supplement: b412587h.pdf [file b412587h.pdf]

## Synthesis and properties of processible copolymer microparticles from chloroanilines and aniline

Xin-Gui Li,<sup>\*a</sup> Mei-Rong Huang,<sup>b</sup> Ya-Qing Lu<sup>b</sup> and Mei-Fang Zhu<sup>b</sup>

<sup>a</sup> Department of Chemistry and Chemical Biology, Harvard University, 12 Oxford Street, Cambridge, Massachusetts 02138, USA. E-mail: xingui@fas.harvard.edu; Fax: 1-617-495-4723; Tel: 1-617-495-1990

<sup>b</sup> Institute of Materials Chemistry, School of Materials Science Engineering, Tongji University, Shanghai 200092, 1239 Siping Road, China

**Table S1.** Solubility and solution color of *o*-chloroaniline(OC)/AN and *m*-chloroaniline(MC)/AN copolymer base microparticles with an oxidant [(NH<sub>4</sub>)<sub>2</sub>S<sub>2</sub>O<sub>8</sub>]/monomer molar ratio of 1/2 in 1 M HCl

| Solvents                             | Solvent dielectric constant <sup>c</sup> | Solubility <sup>a</sup> and polymer solution color <sup>b</sup> in the parentheses |        |        |        |        |                   |        |        |
|--------------------------------------|------------------------------------------|------------------------------------------------------------------------------------|--------|--------|--------|--------|-------------------|--------|--------|
|                                      |                                          | OC/AN molar ratio                                                                  |        |        |        |        | MC/AN molar ratio |        |        |
|                                      |                                          | 0/100                                                                              | 10/90  | 50/50  | 90/10  | 100/0  | 10/90             | 50/50  | 90/10  |
| H <sub>2</sub> SO <sub>4</sub>       | 101                                      | S(BV)                                                                              | S(BV)  | S(BV)  | S(BV)  | S(BV)  | S(BV)             | S(BV)  | S(BV)  |
| DMSO                                 | 47                                       | PS                                                                                 | PS(DB) | PS(DB) | MS(BB) | MS(B)  | PS(DB)            | MS(BB) | MS(BB) |
| Formic acid                          | 58                                       | MS(G)                                                                              | MS(G)  | S(G)   | S(DG)  | S(DG)  | MS(G)             | S(G)   | S(DG)  |
| DMF                                  | 38                                       | PS(B)                                                                              | PS(B)  | PS(B)  | MS(DB) | MS(DB) | PS(B)             | MS(B)  | MS(DB) |
| NMP                                  | 32                                       | MS(BB)                                                                             | MS(BB) | S(BB)  | S(BB)  | S(BB)  | MS(BB)            | S(BB)  | S(BB)  |
| Acetone                              | 21                                       | IS                                                                                 | SS(BL) | PS(BL) | MS(BL) | MS(BL) | SS(BL)            | MS(BL) | PS(BL) |
| CH <sub>2</sub> ClCH <sub>2</sub> Cl | 11                                       | SS                                                                                 | SS(SV) | PS(LV) | MS(V)  | S(V)   | IS                | PS(SV) | IS     |
| CH <sub>2</sub> Cl <sub>2</sub>      | 9                                        | IS                                                                                 | SS(SV) | MS(V)  | MS(V)  | S(V)   | SS                | MS(V)  | MS(V)  |
| THF                                  | 7                                        | IS                                                                                 | PS(B)  | S(B)   | S(B)   | S(B)   | MS(B)             | S(B)   | S(B)   |
| CHCl <sub>3</sub>                    | 5                                        | SS                                                                                 | PS(SV) | MS(V)  | MS(DV) | MS(DV) | PS(SV)            | S(V)   | PS(DV) |

a: IS= insoluble; MS= mainly soluble; PS= partially soluble; S= soluble; SS=slightly soluble.

The letters in parentheses indicate the solution color of the copolymers in the solvents:

B=blue; BB= bluish black; BL =black; BV= bluish violet; DG=dark green; DV= dark violet;

G=green; SV=slightly violet.

**Table S2.** The membrane formability of the OC/AN and MC/AN copolymer base microparticles in NMP by solution casting method on glass and the characteristics of the membranes formed

| <b>OC/AN<br/>molar ratio</b> | 0/100                 | 10/90                 | 30/70                 | 50/50                 | 70/30                 | 90/10                 | 100/0                 |
|------------------------------|-----------------------|-----------------------|-----------------------|-----------------------|-----------------------|-----------------------|-----------------------|
| Membrane formability         | Good                  | Excellent             | Good                  | Good                  | Good                  | Good                  | Good                  |
| Membrane toughness           | Good                  | Excellent             | Good                  | Fair                  | Poor                  | Very poor             | Very poor             |
| Membrane color               | Purple <sup>a</sup>   | Black                 | Black                 |
| Membrane appearance          | Smooth, copper luster | Smooth, slight luster | Smooth, slight luster |
| <b>MC/AN<br/>molar ratio</b> | 0/100                 | 10/90                 | 30/70                 | 50/50                 | 70/30                 | 90/10                 | 96/4                  |
| Membrane formability         | Good                  | Excellent             | Excellent             | Good                  | Good                  | Good                  | Fair                  |
| Membrane toughness           | Good                  | Excellent             | Excellent             | Fair                  | Poor                  | Very poor             | Very poor             |
| Membrane color               | Purple <sup>a</sup>   | Black                 | Black                 |
| Membrane appearance          | Smooth, copper luster | Smooth, slight luster | Smooth                |

a: Their HCl-doped membranes are bluish black and also strongly metallic lustrous.

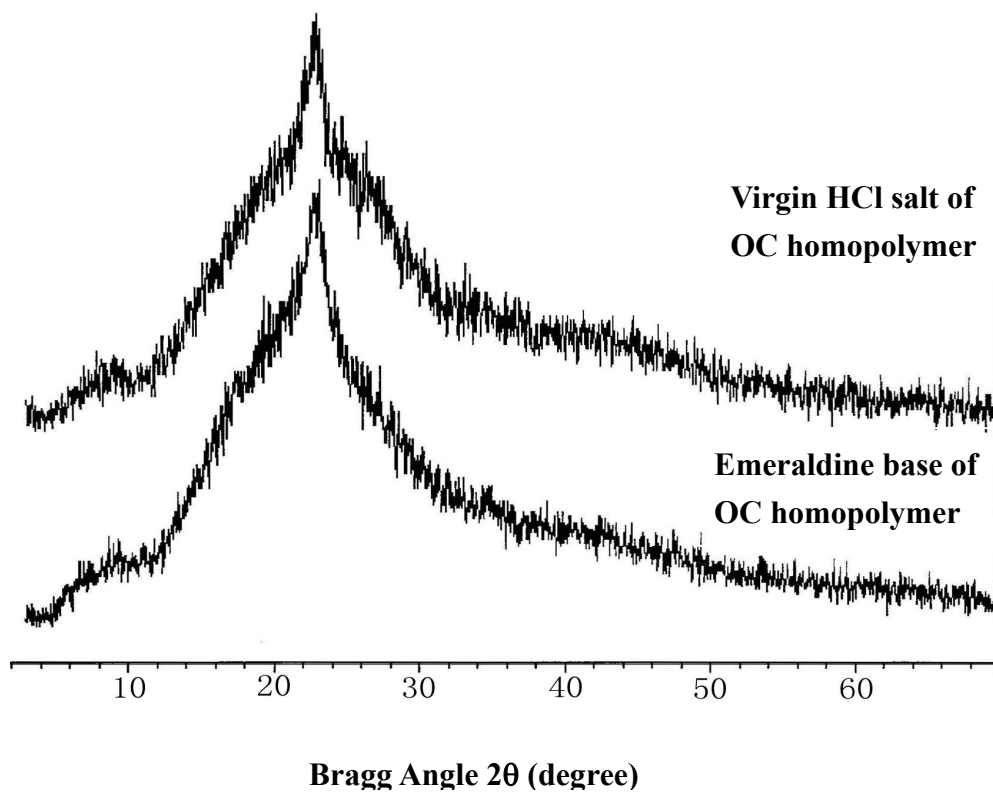

**Fig. S1** Wide-angle X-ray diffractograms of the virgin HCl salt and emeraldine base of OC homopolymer microparticles

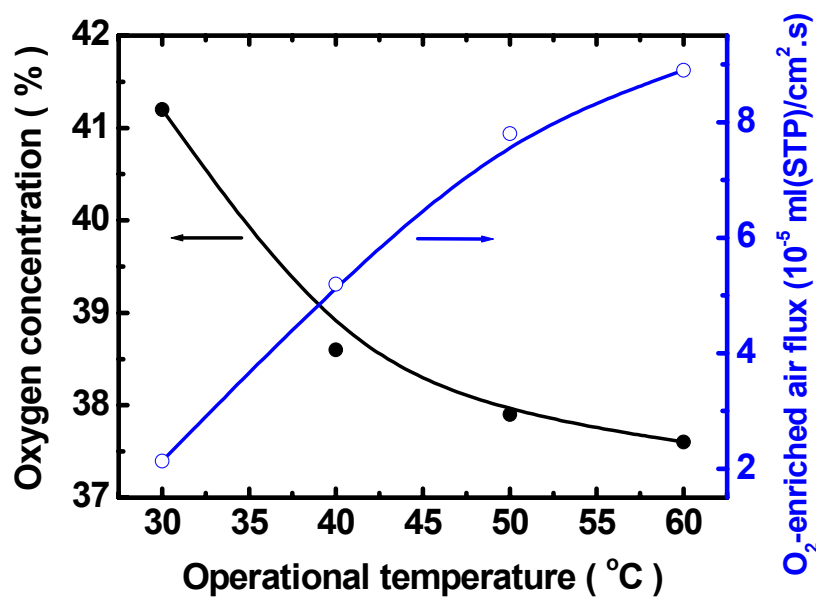

**Fig. S2** Actual air-separation performance through the blend membranes of the MC/AN(30/70) copolymer and 90 wt% ethylcellulose(EC) with operational temperature
